# Supplementary material for: Development of a clinical automatic calculation of hypoglycemia during hemodialysis risk in patients with diabetic nephropathy
Source: PubMed Central journal article supplement (PMC10571353; doi:10.1186/s13098-023-01177-9), 2023-10-13

## Consent confirmatory letter

Written informed consent for patient information and images to be published was provided by the patients. Authors have obtained written informed consent and the written consent itself held by the authors.

Sunday, October 25th, 2022

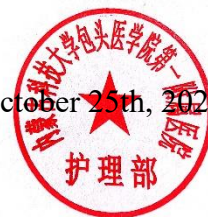

Supplement: 13098_2023_1177_MOESM2_ESM.pdf [file 13098_2023_1177_MOESM2_ESM.pdf]
